# Supplementary material
Source: HighWire-hosted journal article supplement (https://bjo.bmj.com/content/107/6/756)

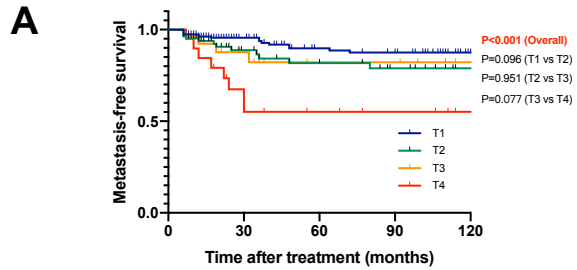

Number at risk

|    |     |     |     |     |     |
|----|-----|-----|-----|-----|-----|
| T1 | 189 | 181 | 175 | 173 | 173 |
| T2 | 84  | 76  | 73  | 72  | 72  |
| T3 | 27  | 24  | 23  | 23  | 23  |
| T4 | 20  | 12  | 12  | 12  | 12  |

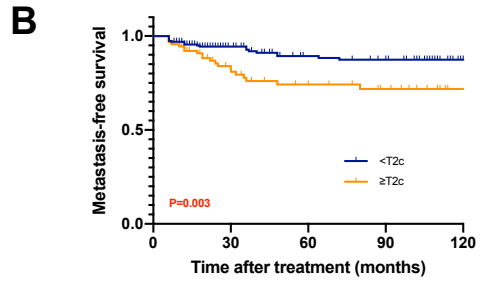

Number at risk

|      |     |     |     |     |     |
|------|-----|-----|-----|-----|-----|
| <T2c | 228 | 216 | 210 | 208 | 208 |
| ≥T2c | 92  | 77  | 73  | 72  | 72  |

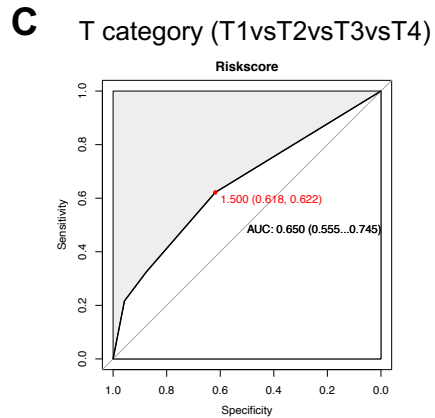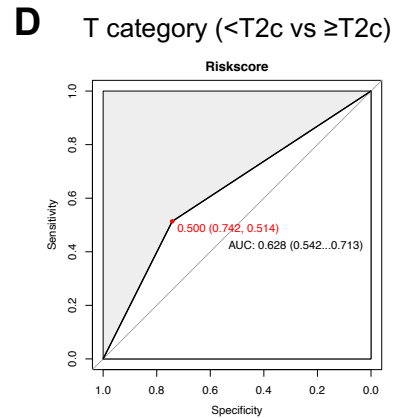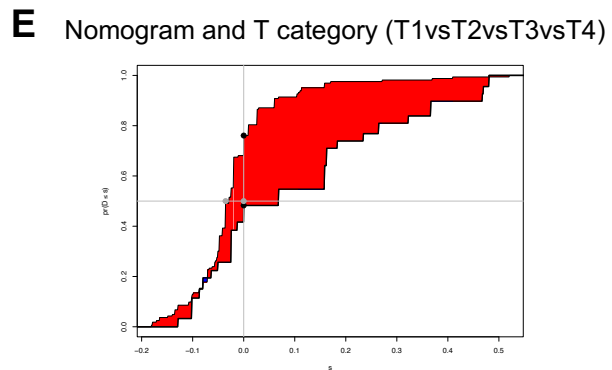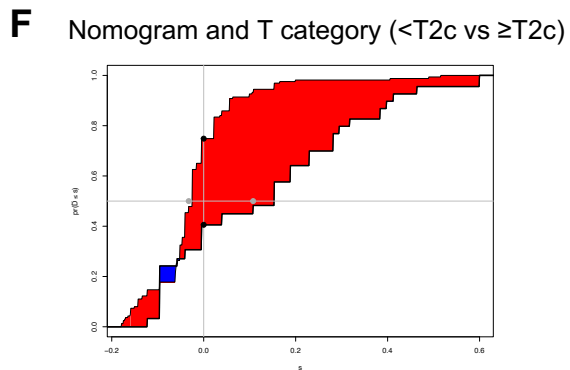

Supplement: inline-supplementary-material-3 [file inline-supplementary-material-3.pdf]
